# Supplementary material for: Does postoperative cognitive decline after coronary bypass affect quality of life?
Source: HighWire-hosted journal article supplement (doi:10.1136/openhrt-2020-001569), 2021-04-01

**Supplementary Material S3. CONSORT Flowchart Study population**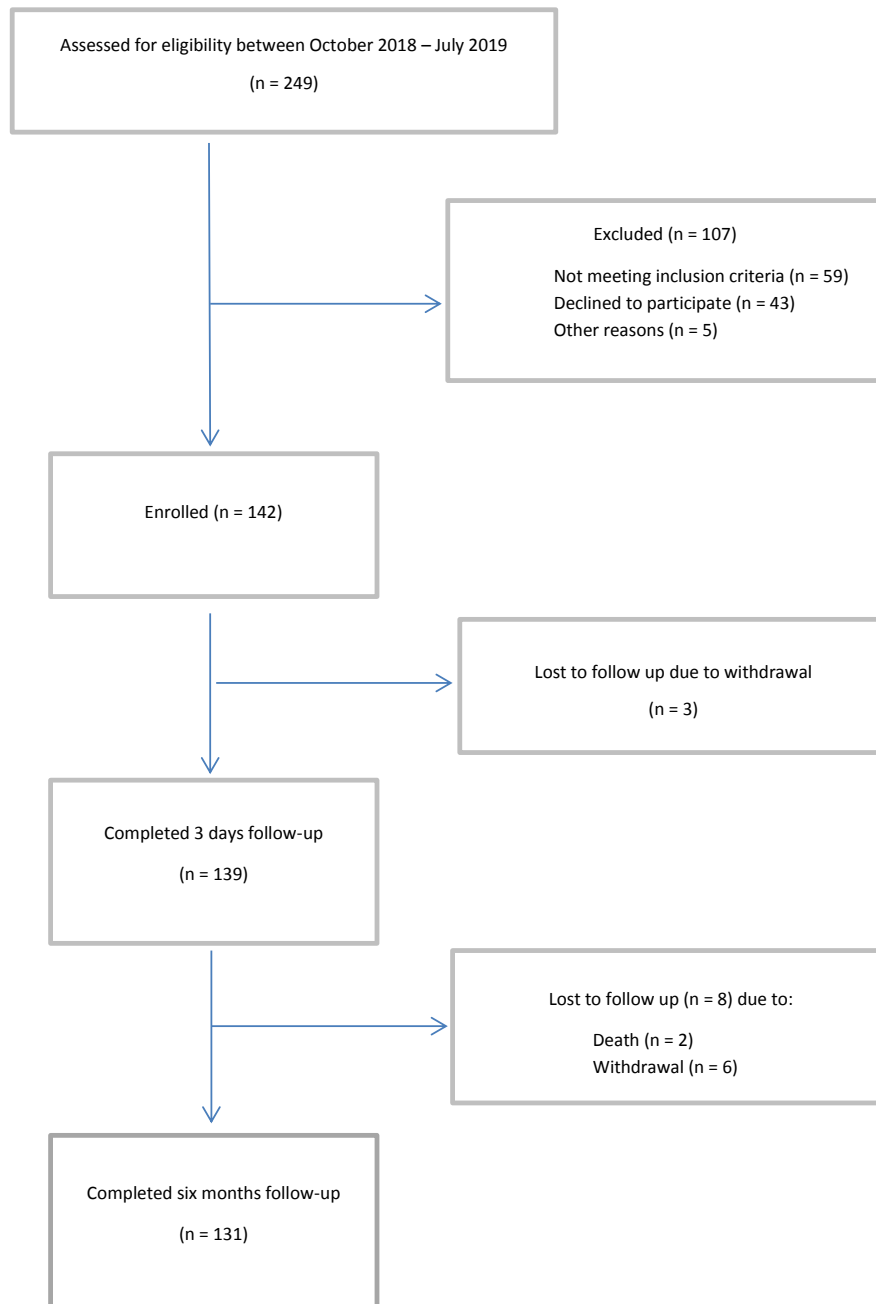

Supplement: openhrt-2020-001569supp003_data_supplement.pdf [file openhrt-2020-001569supp003_data_supplement.pdf]
