# Supplementary material for: Does postoperative cognitive decline after coronary bypass affect quality of life?
Source: Open Heart. 2021 Apr 22;8(1):e001569. doi: 10.1136/openhrt-2020-001569 (PMC8070880; doi:10.1136/openhrt-2020-001569)
Supplement: Supplementary data [file openhrt-2020-001569supp001.pdf]

**Supplementary Material S1.** STROBE Statement—Checklist of items that should be included in reports of *cohort studies*

|                              | Item No | Recommendation                                                                                                                                                                       | Page No |
|------------------------------|---------|--------------------------------------------------------------------------------------------------------------------------------------------------------------------------------------|---------|
| Title and abstract           | 1       | (a) Indicate the study’s design with a commonly used term in the title or the abstract                                                                                               | 3       |
|                              |         | (b) Provide in the abstract an informative and balanced summary of what was done and what was found                                                                                  | 3       |
| Introduction                 |         |                                                                                                                                                                                      |         |
| Background/rationale         | 2       | Explain the scientific background and rationale for the investigation being reported                                                                                                 | 4       |
| Objectives                   | 3       | State specific objectives, including any prespecified hypotheses                                                                                                                     | 4       |
| Methods                      |         |                                                                                                                                                                                      |         |
| Study design                 | 4       | Present key elements of study design early in the paper                                                                                                                              | 5       |
| Setting                      | 5       | Describe the setting, locations, and relevant dates, including periods of recruitment, exposure, follow-up, and data collection                                                      | 5-8     |
| Participants                 | 6       | (a) Give the eligibility criteria, and the sources and methods of selection of participants. Describe methods of follow-up                                                           | 5       |
|                              |         | (b) For matched studies, give matching criteria and number of exposed and unexposed                                                                                                  | n/a     |
| Variables                    | 7       | Clearly define all outcomes, exposures, predictors, potential confounders, and effect modifiers. Give diagnostic criteria, if applicable                                             | 6-7     |
| Data sources/<br>measurement | 8*      | For each variable of interest, give sources of data and details of methods of assessment (measurement). Describe comparability of assessment methods if there is more than one group | 5-7     |
| Bias                         | 9       | Describe any efforts to address potential sources of bias                                                                                                                            | 5       |
| Study size                   | 10      | Explain how the study size was arrived at                                                                                                                                            | 7       |
| Quantitative variables       | 11      | Explain how quantitative variables were handled in the analyses. If applicable, describe which groupings were chosen and why                                                         | 8       |
| Statistical methods          | 12      | (a) Describe all statistical methods, including those used to control for                                                                                                            | 7-8     |

|                  |     |                                                                                                                                                                                                   |              |
|------------------|-----|---------------------------------------------------------------------------------------------------------------------------------------------------------------------------------------------------|--------------|
|                  |     | confounding                                                                                                                                                                                       |              |
|                  |     | (b) Describe any methods used to examine subgroups and interactions                                                                                                                               | 6            |
|                  |     | (c) Explain how missing data were addressed                                                                                                                                                       | 7            |
|                  |     | (d) If applicable, explain how loss to follow-up was addressed                                                                                                                                    | 8            |
|                  |     | (e) Describe any sensitivity analyses                                                                                                                                                             | n/a          |
| Results          |     |                                                                                                                                                                                                   |              |
| Participants     | 13* | (a) Report numbers of individuals at each stage of study—eg numbers potentially eligible, examined for eligibility, confirmed eligible, included in the study, completing follow-up, and analysed | S3           |
|                  |     | (b) Give reasons for non-participation at each stage                                                                                                                                              | 10 + S3      |
|                  |     | (c) Consider use of a flow diagram                                                                                                                                                                | S3           |
| Descriptive data | 14* | (a) Give characteristics of study participants (eg demographic, clinical, social) and information on exposures and potential confounders                                                          | 10 + table 1 |
|                  |     | (b) Indicate number of participants with missing data for each variable of interest                                                                                                               | 10 + S3      |
|                  |     | (c) Summarise follow-up time (eg, average and total amount)                                                                                                                                       | 10           |
| Outcome data     | 15* | Report numbers of outcome events or summary measures over time                                                                                                                                    | 10-12        |

|                          |    |                                                                                                                                                                                                              |                      |
|--------------------------|----|--------------------------------------------------------------------------------------------------------------------------------------------------------------------------------------------------------------|----------------------|
| Main results             | 16 | (a) Give unadjusted estimates and, if applicable, confounder-adjusted estimates and their precision (eg, 95% confidence interval). Make clear which confounders were adjusted for and why they were included | n/a                  |
|                          |    | (b) Report category boundaries when continuous variables were categorized                                                                                                                                    | n/a                  |
|                          |    | (c) If relevant, consider translating estimates of relative risk into absolute risk for a meaningful time period                                                                                             | n/a                  |
| Other analyses           | 17 | Report other analyses done—eg analyses of subgroups and interactions, and sensitivity analyses                                                                                                               | table 3<br>+ S4 - S6 |
| <b>Discussion</b>        |    |                                                                                                                                                                                                              |                      |
| Key results              | 18 | Summarise key results with reference to study objectives                                                                                                                                                     | 10                   |
| Limitations              | 19 | Discuss limitations of the study, taking into account sources of potential bias or imprecision. Discuss both direction and magnitude of any potential bias                                                   | 13-14                |
| Interpretation           | 20 | Give a cautious overall interpretation of results considering objectives, limitations, multiplicity of analyses, results from similar studies, and other relevant evidence                                   | 13-14                |
| Generalisability         | 21 | Discuss the generalisability (external validity) of the study results                                                                                                                                        | 14                   |
| <b>Other information</b> |    |                                                                                                                                                                                                              |                      |
| Funding                  | 22 | Give the source of funding and the role of the funders for the present study and, if applicable, for the original study on which the present article is based                                                | 15                   |

\*Give information separately for exposed and unexposed groups.
